# Supplementary material for: Tumor-suppressive function of EZH2 is through inhibiting glutaminase
Source: PubMed Central journal article supplement (PMC8528894; doi:10.1038/s41419-021-04212-7), 2021-10-20

**Supplementary Figure. 1 The effects of glucose deprivation on the expression of PRC2 complex genes.**

**A**

| sgRNA  | Target | Group S | Group R | R/S      |
|--------|--------|---------|---------|----------|
| S_1244 | EZH2   | 159     | 294     | 1.849057 |
| S_1245 | EZH2   | 4170    | 6530    | 1.565947 |
| S_1242 | EZH2   | 722     | 1243    | 1.721607 |
| S_1243 | EZH2   | 127     | 257     | 2.023622 |
| S_1311 | SUZ12  | 12130   | 18370   | 1.514427 |
| S_1313 | SUZ12  | 6087    | 8500    | 1.396419 |
| S_1310 | SUZ12  | 573     | 758     | 1.322862 |
| S_1312 | SUZ12  | 3437    | 2554    | 0.74309  |
| S_2379 | EED    | 14387   | 13406   | 0.931813 |
| S_2380 | EED    | 436     | 306     | 0.701835 |
| S_2381 | EED    | 834     | 576     | 0.690647 |
| S_1226 | PHF19  | 755     | 1409    | 1.866225 |
| S_1225 | PHF19  | 1550    | 2111    | 1.361935 |
| S_1227 | PHF19  | 2232    | 2024    | 0.90681  |
| S_1228 | PHF19  | 9114    | 6288    | 0.689928 |

**B**

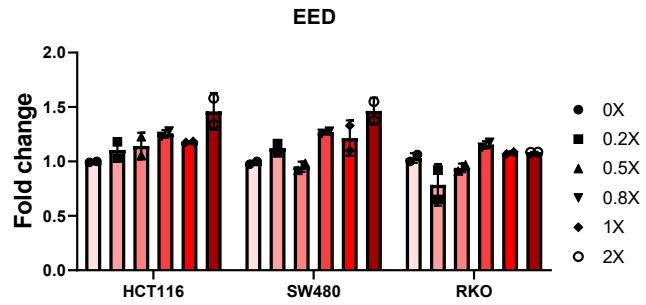

**C**

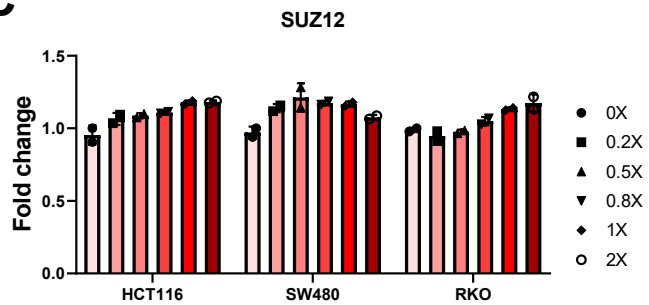

**D**

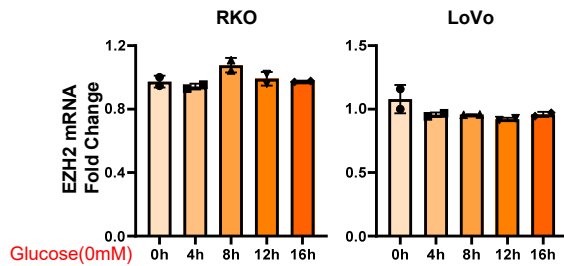

**E**

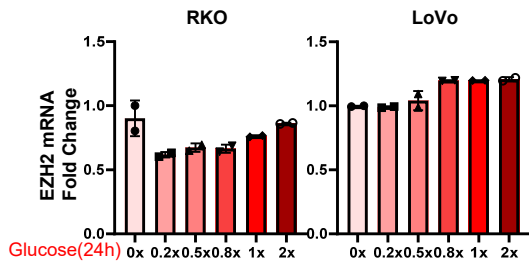

**A.** Table illustrating sgRNA targeting PRC2 complex genes enriched in group R (Resistance) and S (Sensitive).

**B-C.** RT-qPCR of EED (B) or SUZ12 (C) levels in HCT116, SW480, and RKO cells treated with different doses of glucose as indicated.

**D-E.** RT-qPCR of EZH2 levels in RKO and LoVo cells under glucose deprivation for indicated time (D) or treated with indicated doses of glucose for 24 h (E). 1×glucose, 25 mM.

**Supplementary Figure. 2** EZH2 deletion promotes GLS expression and inhibits glucose-induced downregulation of GLS in HCT116 cells, but not in RKO cells.

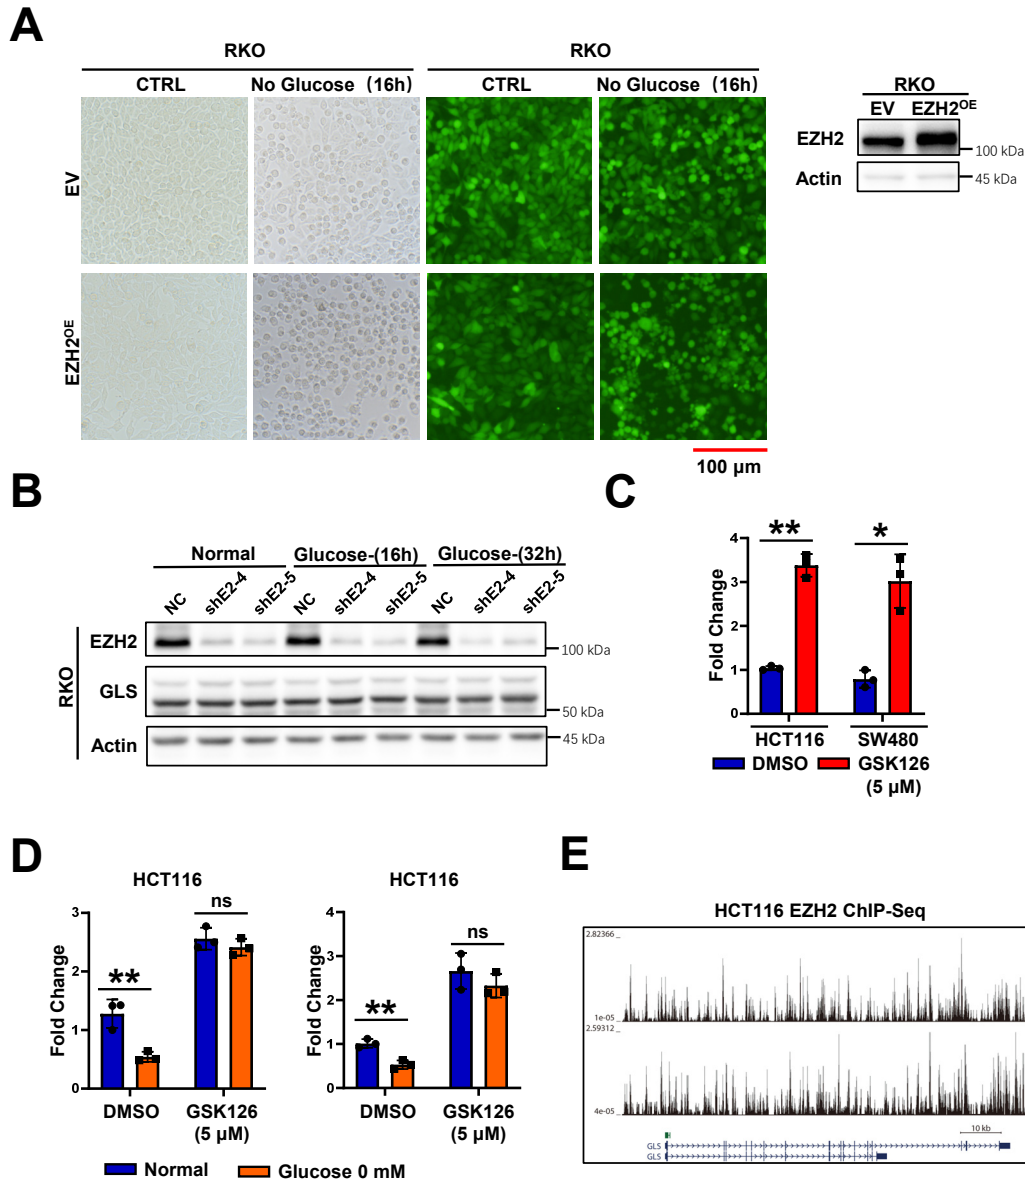

**A.** Images (left) and immunoblotting for EZH2 expression (right) in RKO EV and EZH2<sup>OE</sup> cells under glucose deprivation for 16 h. **B.** Immunoblotting for EZH2 and GLS expression in RKO NC and shEZH2 cells under glucose deprivation for indicated time. Actin is used as a loading control. **C.** qPCR of GLS levels in HCT116 and SW480 cells treated with or without 5  $\mu$ M GSK126. **D.** qPCR of GLS levels in HCT116 pretreated with or without 5  $\mu$ M GSK126, followed by glucose deprivation. **E.** Schematic representation the binding of EZH2 on the *GLS* gene locus in HCT116 cells with the ENCODE project.

Supplementary Figure. 3 EZH2 promotes tumorigenesis in the colon.

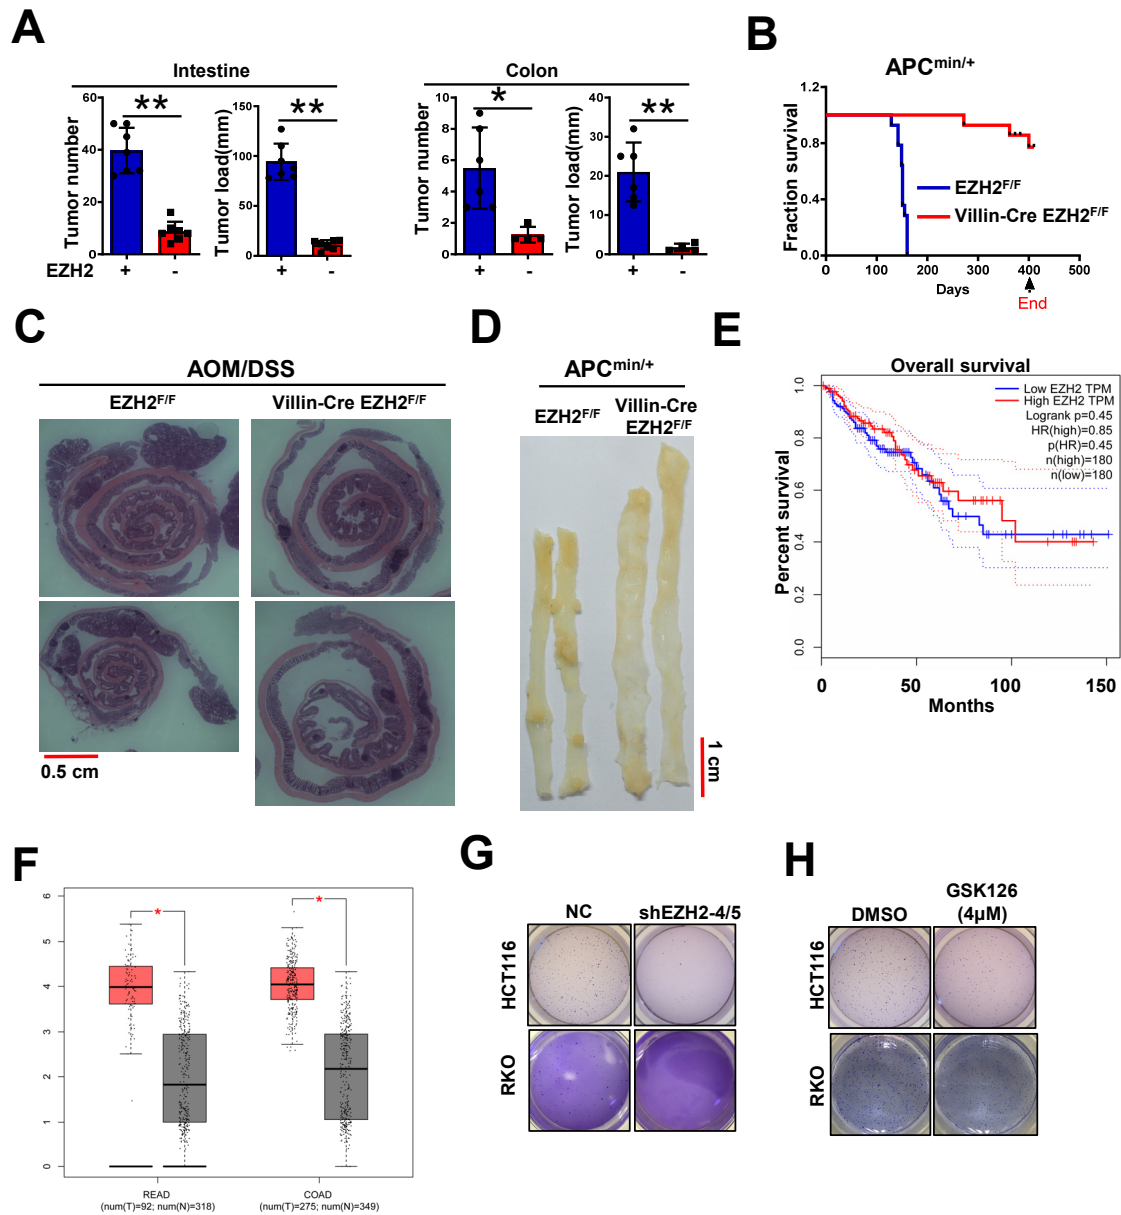

**A.** Tumor number and tumor load in intestine (left) and colon (right) from APC<sup>min/+</sup>; EZH2<sup>F/F</sup> and APC<sup>min/+</sup>; Villin-Cre; EZH2<sup>F/F</sup> mice that were 4 months old. **B.** Survival of APC<sup>min/+</sup>; EZH2<sup>F/F</sup> (n=10) and APC<sup>min/+</sup>; Villin-Cre; EZH2<sup>F/F</sup> (n=10) mice. **C.** H&E staining of tumor counts in intestinal sections from AOM/DSS treated EZH2<sup>F/F</sup> and Villin-Cre; EZH2<sup>F/F</sup> mice. **D.** Images of tumor counts in the colons of APC<sup>min/+</sup>; EZH2<sup>F/F</sup> and APC<sup>min/+</sup>; Villin-Cre; EZH2<sup>F/F</sup> mice. **E.** Kaplan–Meier plots of colorectal cancer patients stratified by EZH2 expression. **F.** Boxplot of EZH2 expression levels in healthy controls (grey) and colorectal cancer patients (Red), TCGA. **G–H.** Colony formation of HCT116 or RKO NC and shEZH2 cells (g) or HCT116 or RKO cells treated with or without 4 μM GSK126 (h).

**Supplementary Figure. 4 The effects of EZH2 knockdown on the expression of glycolysis related genes and glucose uptake**

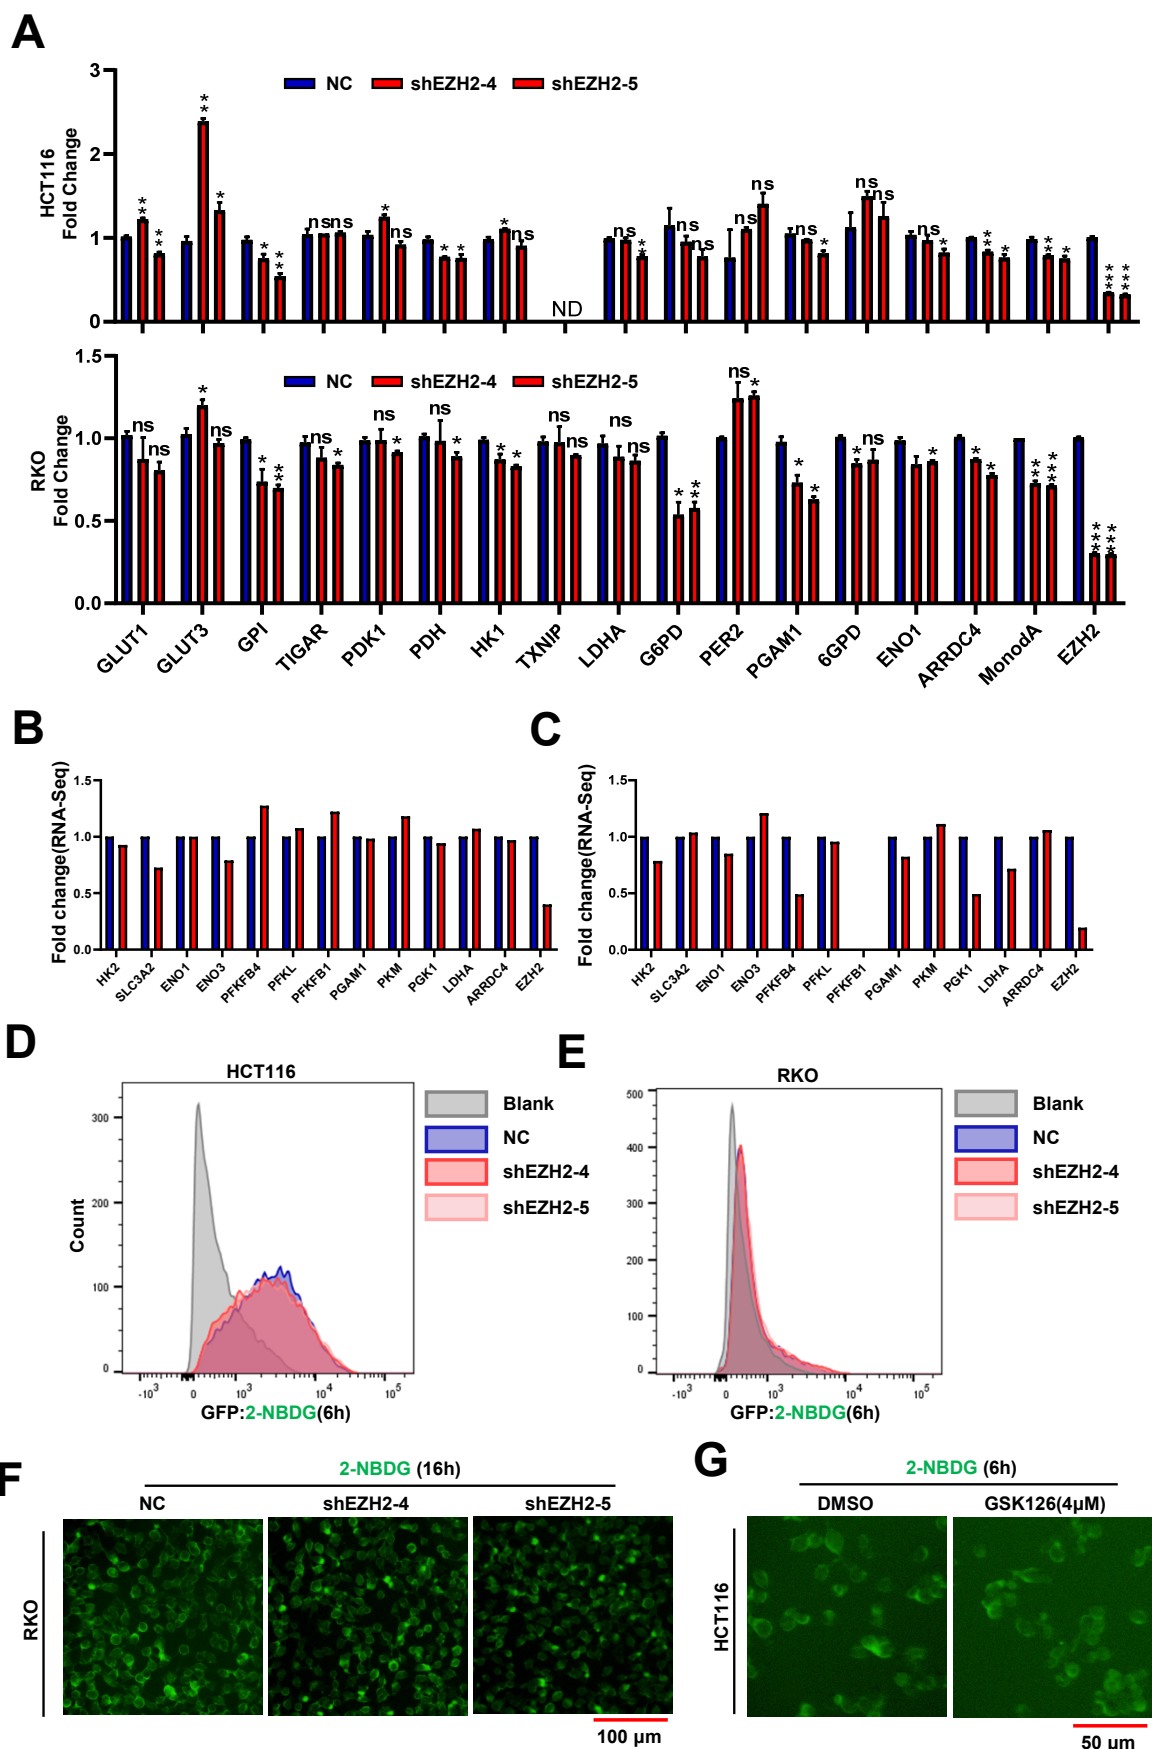

**A.** qPCR of glycolysis related genes and EZH2 levels in HCT116 (up) or RKO (down) NC and shEZH2 cells. **B-C.** RNA-Seq analysis of glycolysis related genes and EZH2 levels in HCT116 (b) or RKO (c) NC and shEZH2 cells. **D-E.** FACS analysis of glucose uptake in HCT116 (d) or RKO (e) NC and shEZH2 cells treated with 2-NBDG for 6 h. **F-G.** Images of glucose uptake using 2-NBDG for indicated time in RKO NC and shEZH2 cells (f) or HCT116 cells pretreated with or without 4  $\mu$ M GSK126 (g).

**Supplementary Figure. 5** EZH2 regulation of glucose vulnerability is not mediated through Hippo-Yap pathway.

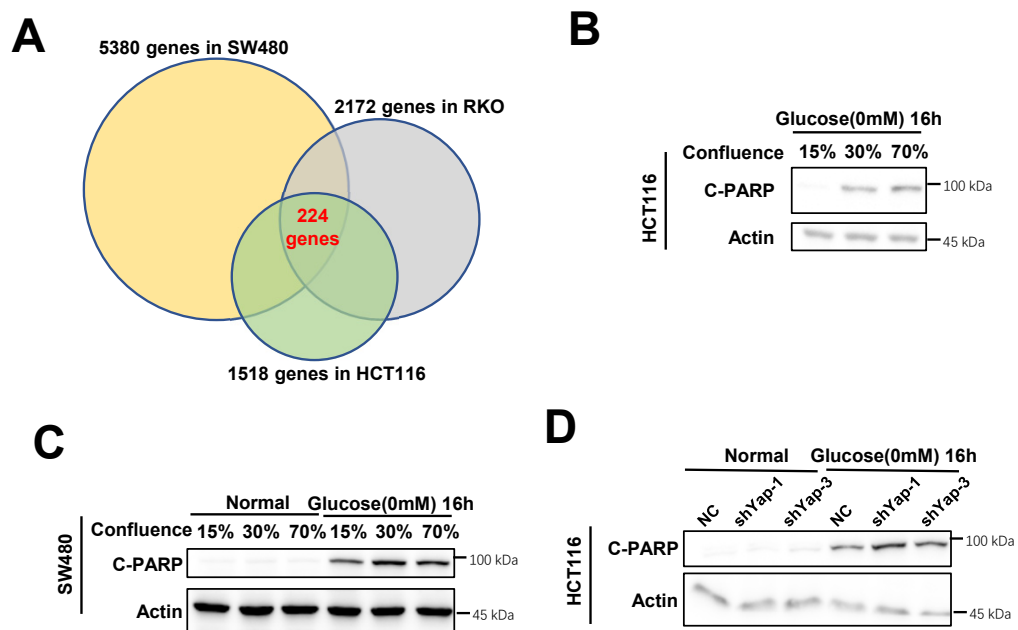

**A.** Venn diagram showing the overlap between genes upregulated by EZH2 knockdown in HCT116 and RKO cells, and genes upregulated by EZH2 knockdown in SW480 sequencing dataset GSE118593. **B-C.** Immunoblotting for cleaved-PARP expression in HCT116 (b) or SW480 (c) cells seeded at the indicated density under glucose deprivation for 16 h. **D.** Immunoblotting for cleaved-PARP expression in HCT116 NC and shYap cells under glucose deprivation for 16 h. Actin is used as a loading control.

**Supplementary Figure. 6 EZH2 inhibitor and mTOR inhibitor synergistically inhibit CRC cell growth.**

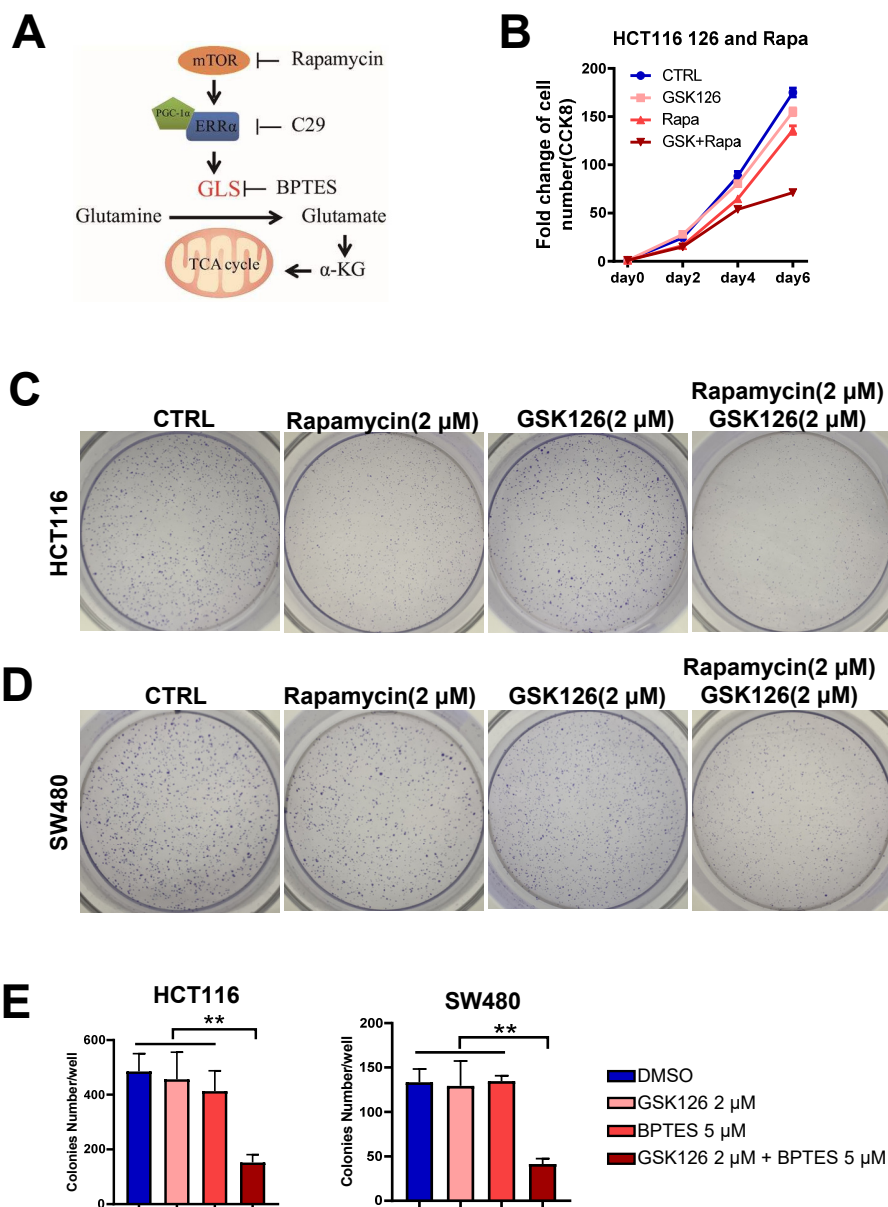

**A.** Schematic diagram showing mTOR inhibitor rapamycin could inhibit GLS activity. **B.** Growth curves of HCT116 cells in presence of 2  $\mu$ M GSK126 or/and 2  $\mu$ M rapamycin. **C-D.** Colony formation of HCT116 (d) or SW480 (e) cells in presence of 2  $\mu$ M GSK126 or/and 2  $\mu$ M rapamycin. **E.** Synergistic treatment of EZH2 inhibitor and GLS inhibitor significantly reduce the colony formation of CRC cells in soft agar.

**Supplementary Figure. 7 The working model depicting how EZH2 regulates GLS-GSH and glucose-deprivation-induced cell death.**

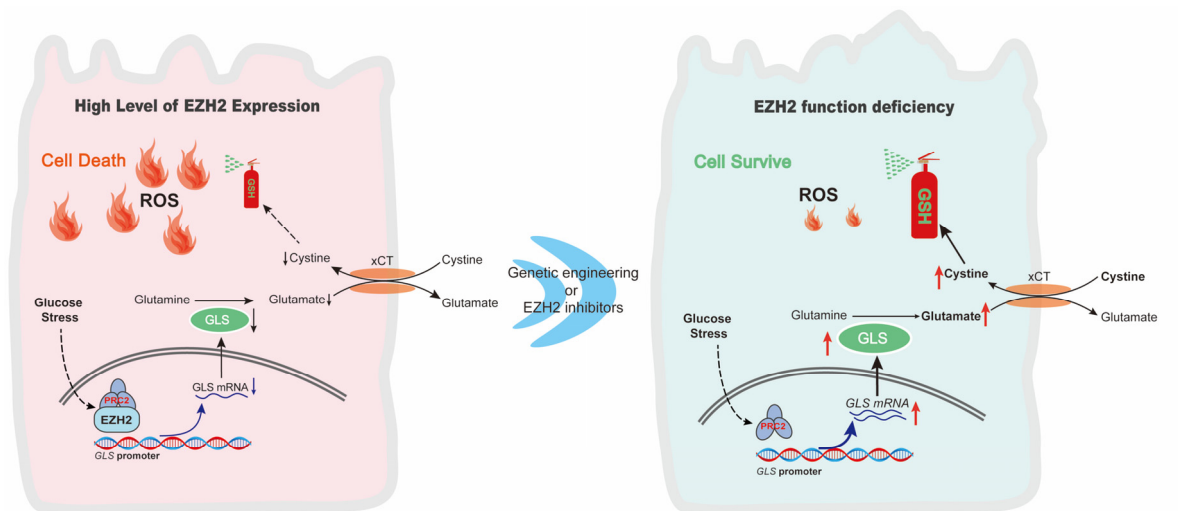

EZH2 deficiency causes high GLS expression, thereby facilitating GSH synthesis and attenuating glucose-deprivation-induced ROS accumulation and cell death.

**Figure 1A**

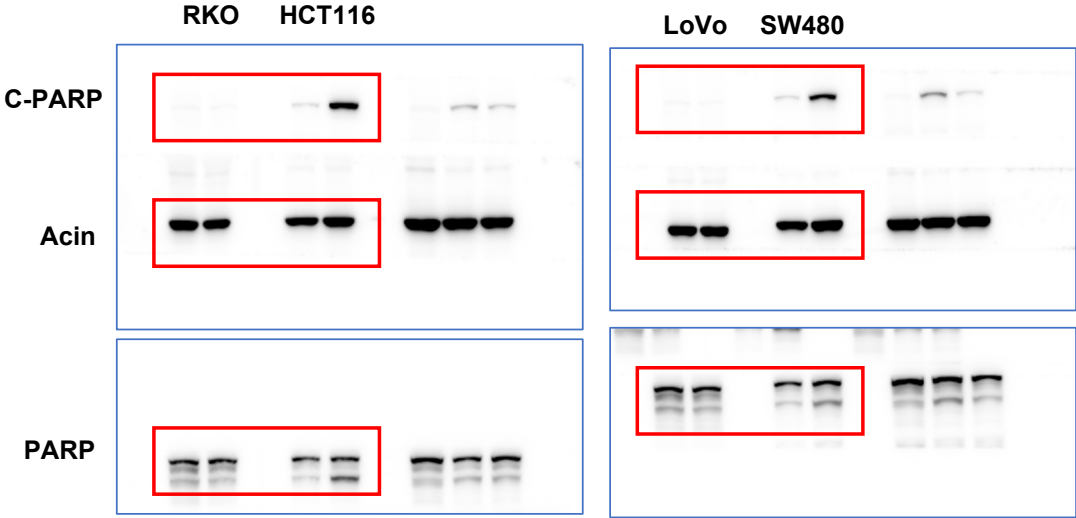

**Figure 2F**

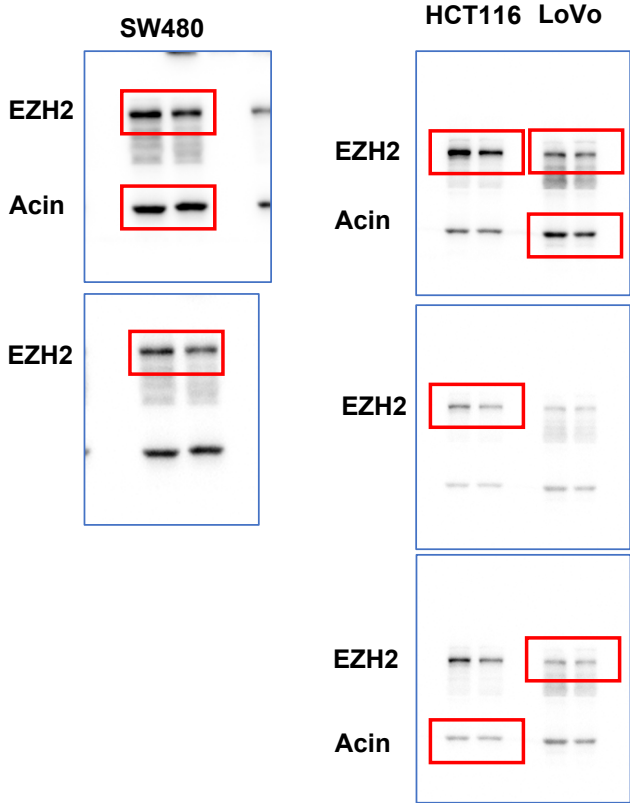



**Figure 2C**

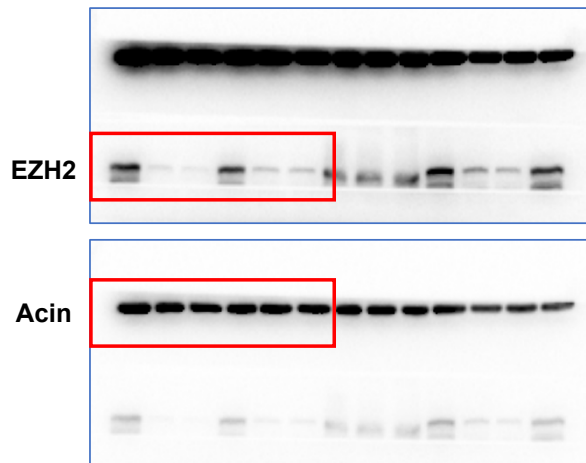

**Figure 2D**

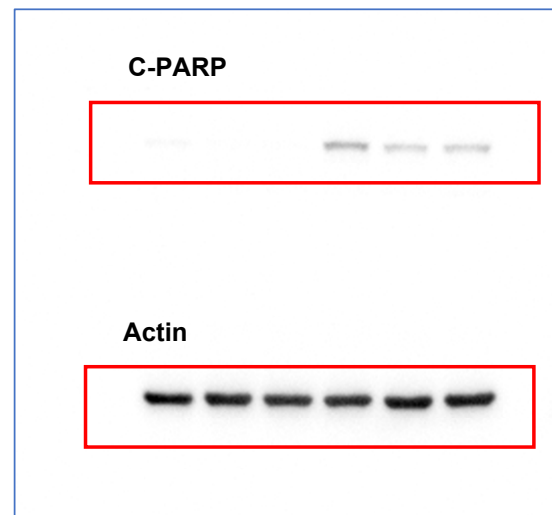

**Figure 2E**

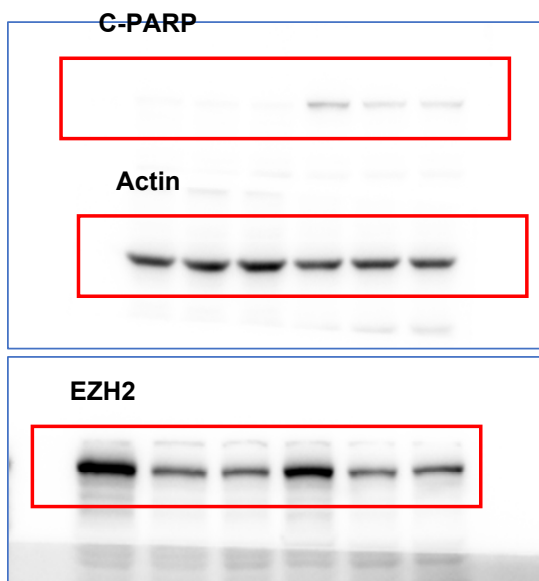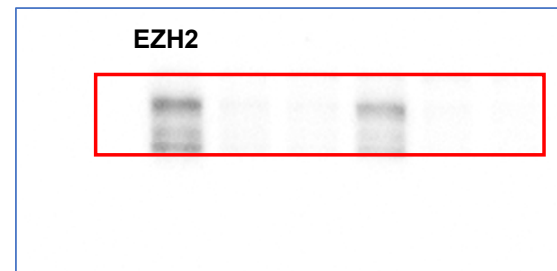

**Figure 2F**

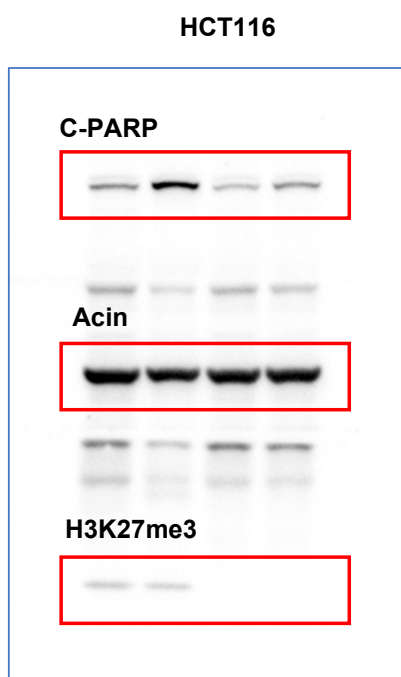

**Figure 2G**

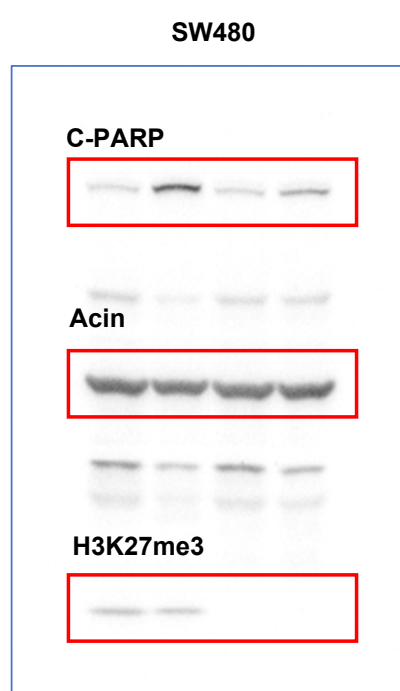

**Figure 2H**

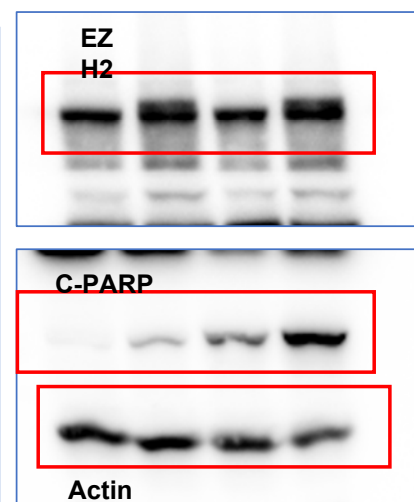

**Figure 3D**

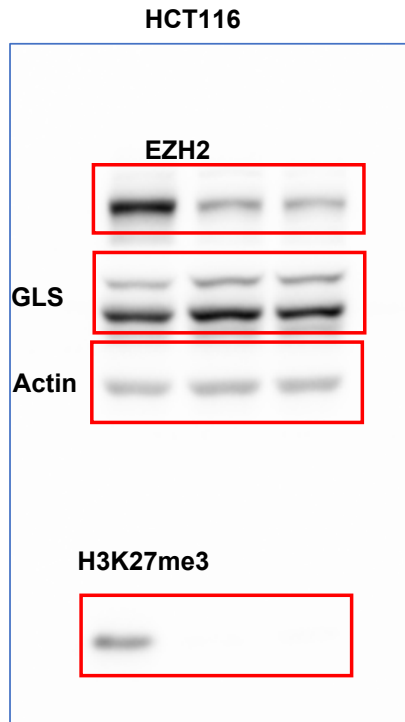

**Figure 3E**

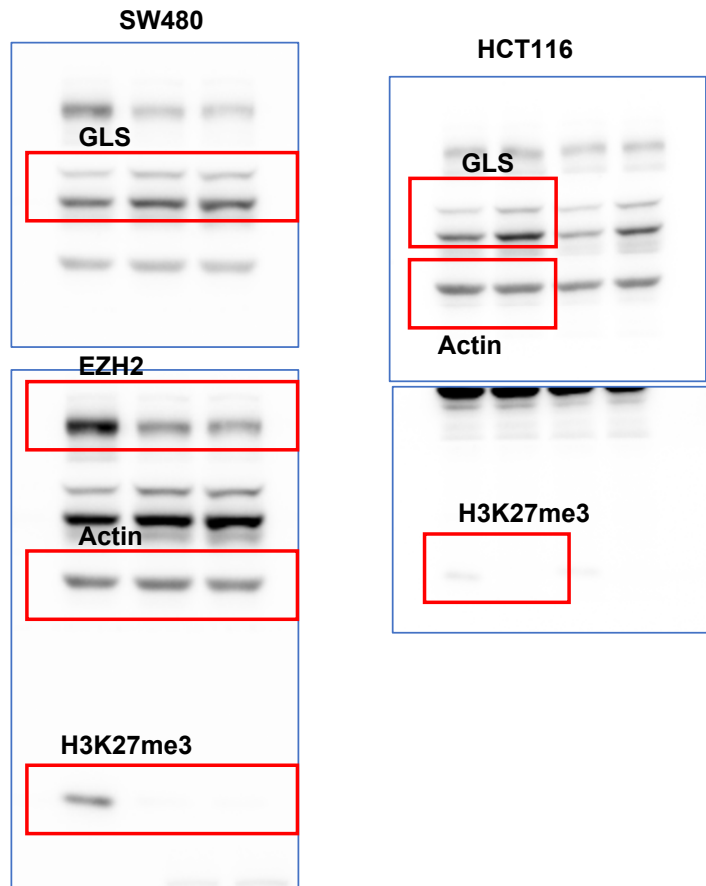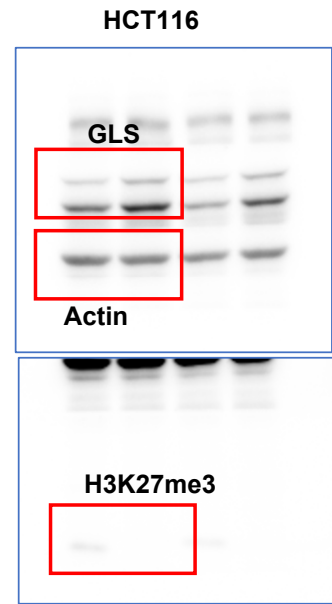

**Figure 3E**

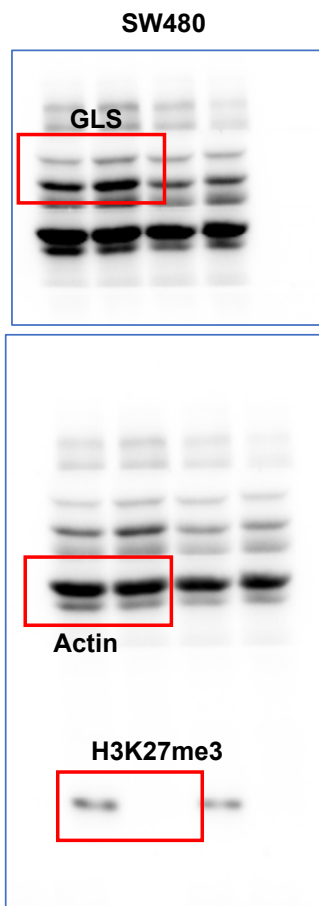

**Figure 3F**

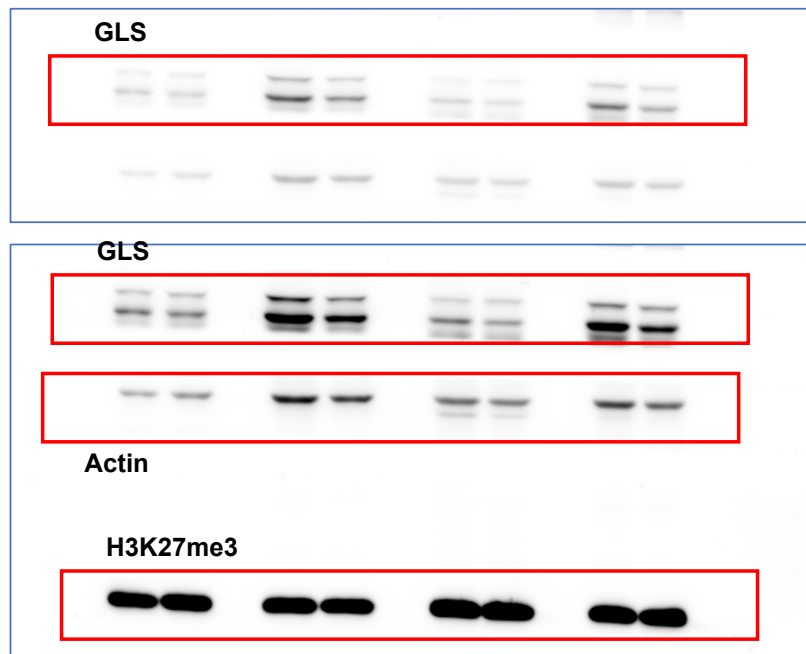

**Figure 3H**

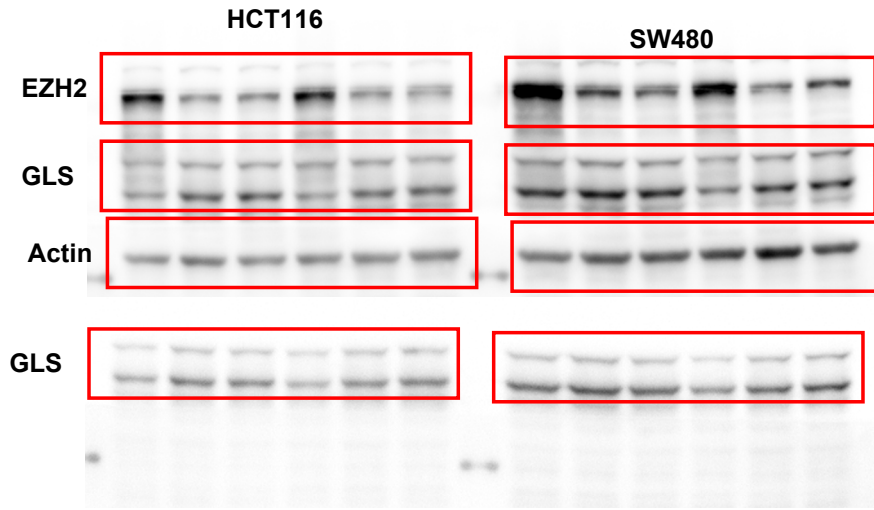

**Figure 3I**

**Figure 3J**

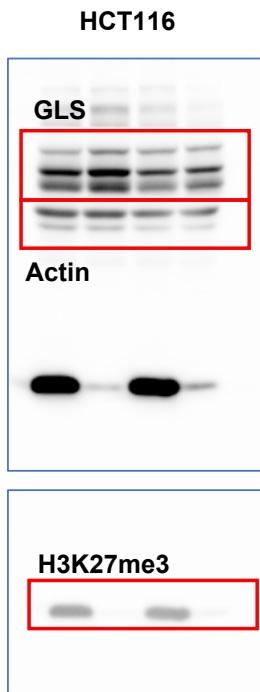

**Figure 3K**

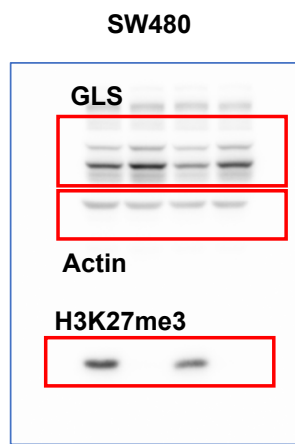

**Figure 4I**

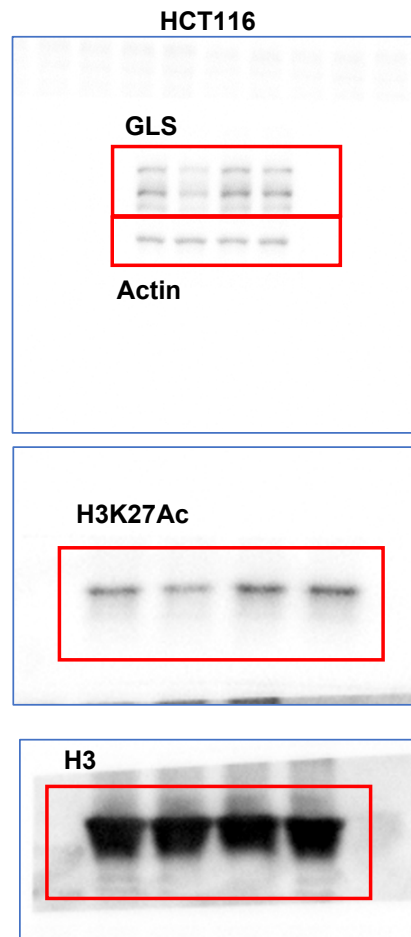

**Figure 6A**

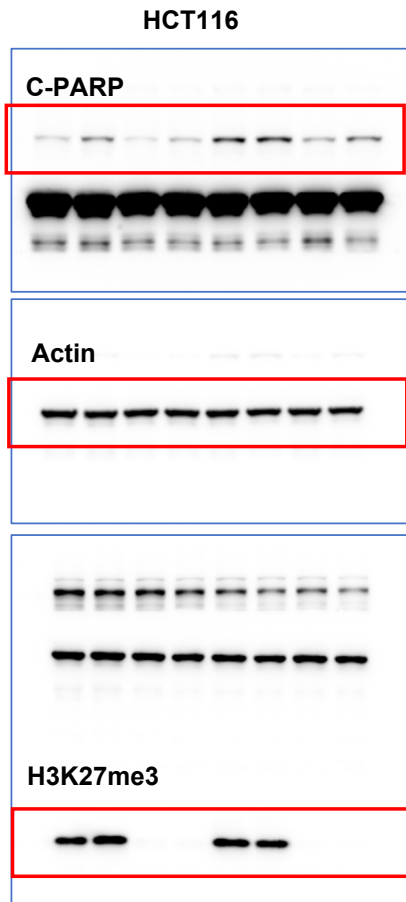

**Figure 6C**

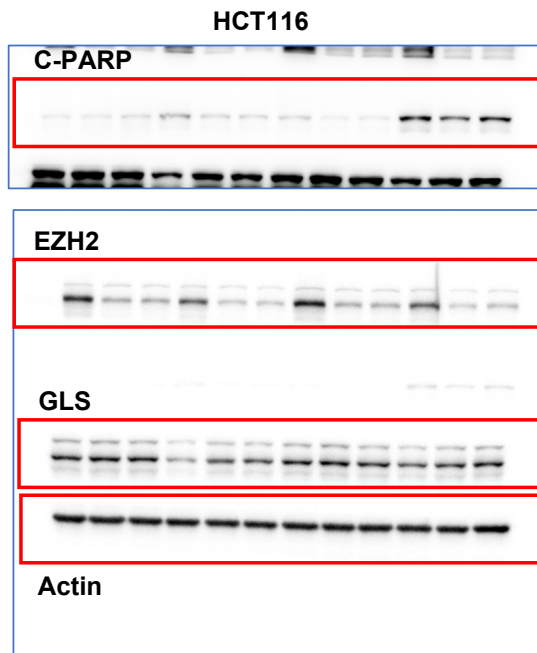

**Figure 6B**

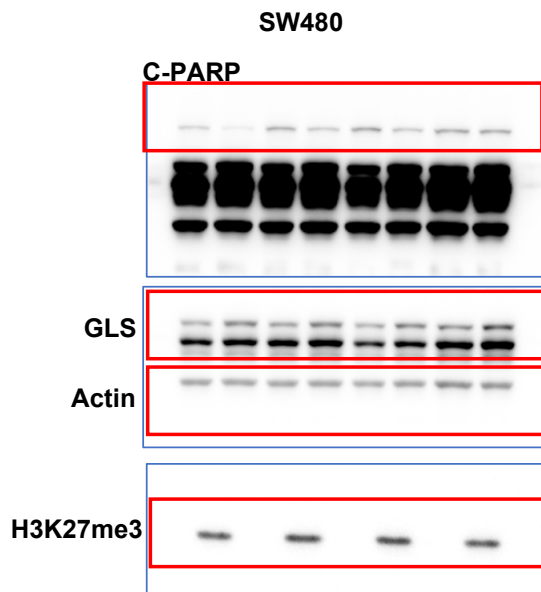

**Figure 6D**

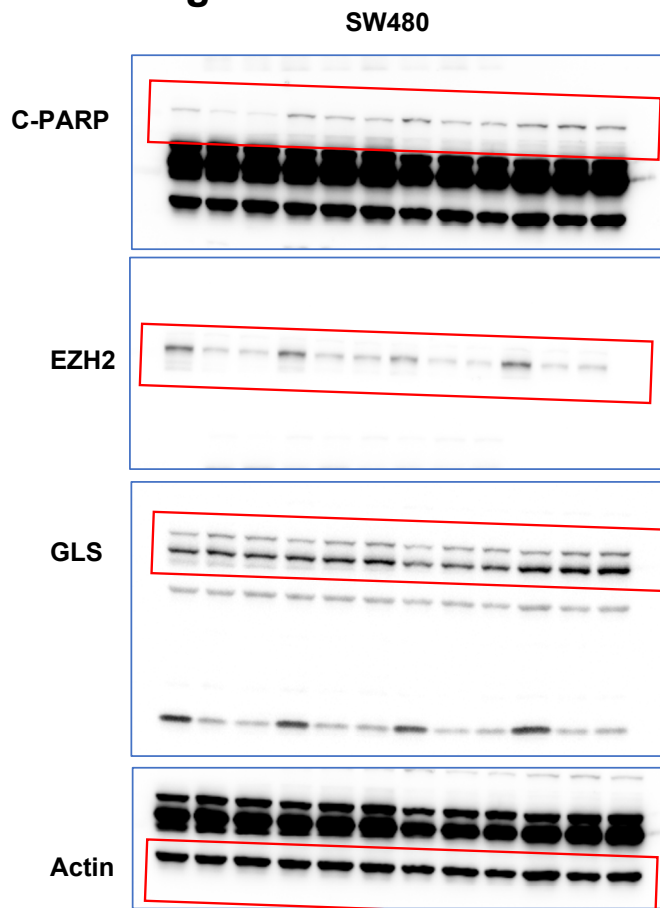

**Figure 7A**

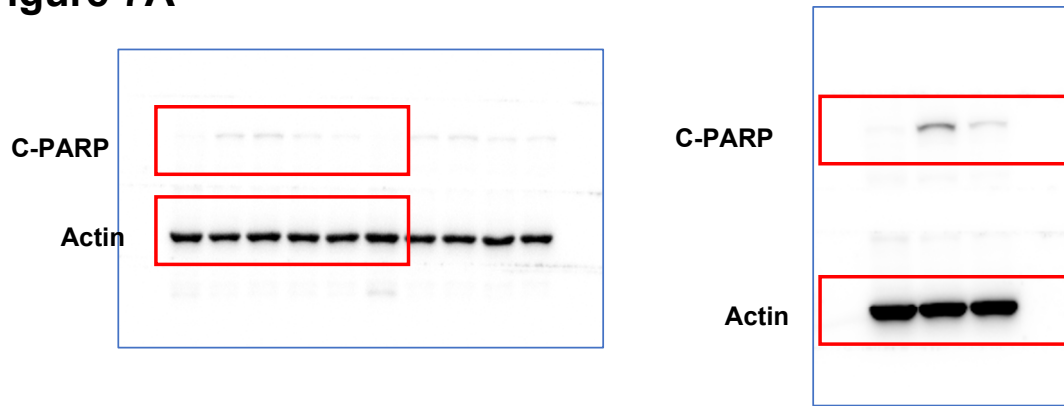

**Supplementary Figure 2B**

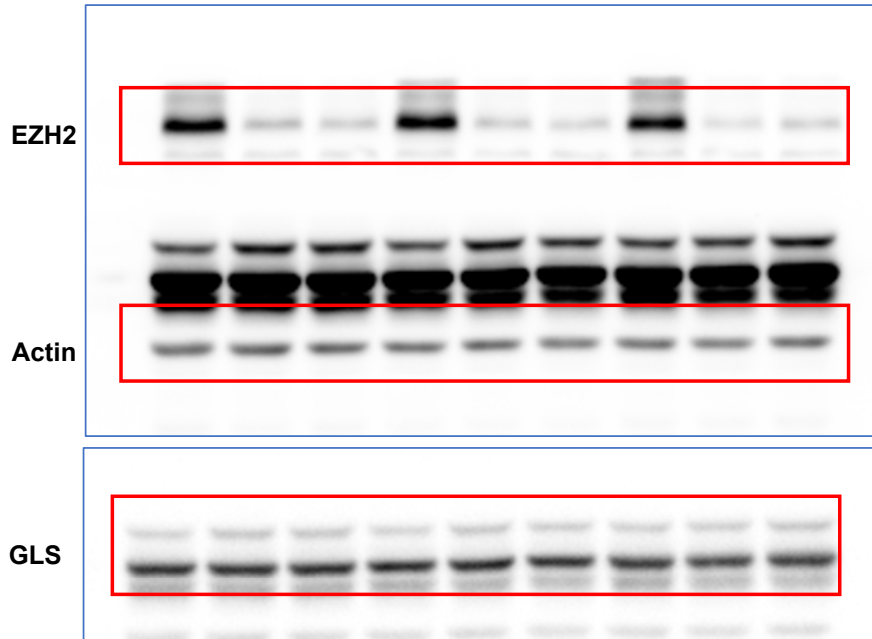

**Supplementary Figure 5B**

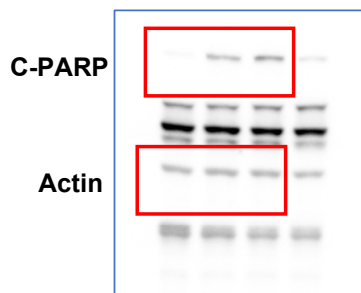

**Supplementary Figure 5C**

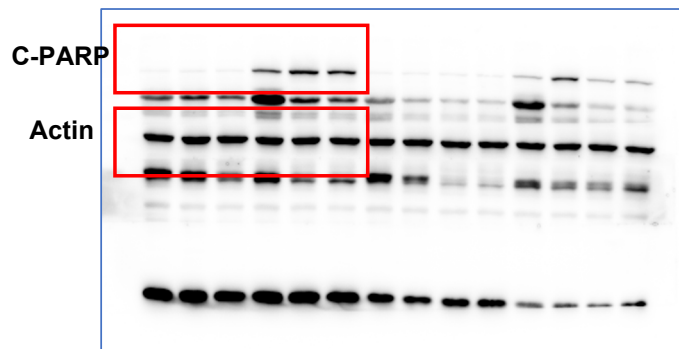

**Supplementary Figure 5D**

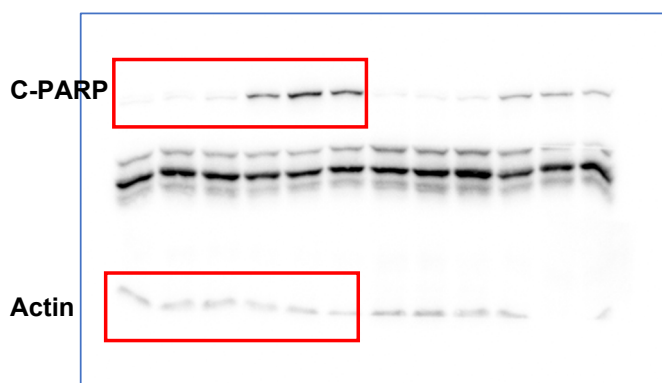

Supplement: 41419_2021_4212_MOESM1_ESM.pdf [file 41419_2021_4212_MOESM1_ESM.pdf]
